# Supplementary material
Source: PubMed Central journal article supplement (PMC3682464)
Supplement: NIHMS386038-supplement-supplement_1.pdf [file NIHMS386038-supplement-supplement_1.pdf]

## SUPPLEMENTARY MATERIAL

**Supplementary Table 1.** Association results for hip OF for all the SNPs tested in this study.

| Locus     | Nearest gene     | SNP        | Position        | Allele <sup>a</sup> | MAF cases | MAF controls | P value | OR (95%CI)       |         |                  |
|-----------|------------------|------------|-----------------|---------------------|-----------|--------------|---------|------------------|---------|------------------|
| 1p36      | <i>ZBTB40</i>    | rs7524102  | 22571034        | G/A                 | 0.191     | 0.213        | 0.316   | 0.87 (0.67-1.14) |         |                  |
|           |                  | rs6696981  | 22575445        | T/G                 | 0.190     | 0.209        | 0.383   | 0.89 (0.68-1.16) |         |                  |
|           |                  | rs6426749  | 22584060        | C/G                 | 0.186     | 0.206        | 0.352   | 1.14 (0.87-1.49) |         |                  |
|           |                  | rs7543680  | 22603856        | A/G                 | 0.236     | 0.243        | 0.754   | 1.04 (0.81-1.33) |         |                  |
| 1p31      | <i>GPR177</i>    | rs2566755  | 68407978        | C/T                 | 0.213     | 0.225        | 0.569   | 1.07 (0.83-1.38) |         |                  |
| 2p21      | <i>SPTBN1</i>    | rs11898505 | 54538061        | A/G                 | 0.059     | 0.054        | 0.776   | 0.93 (0.55-1.57) |         |                  |
| 3p22      | <i>CTNNB1</i>    | rs10490823 | 41098739        | T/C                 | 0.262     | 0.294        | 0.197   | 0.85 (0.67-1.08) |         |                  |
|           |                  | rs87938    | 41112676        | G/A                 | 0.375     | 0.386        | 0.707   | 0.96 (0.77-1.19) |         |                  |
| 4q22      | <i>MEPE</i>      | rs1471403  | 88994267        | T/C                 | 0.337     | 0.338        | 0.969   | 0.99 (0.79-1.24) |         |                  |
| 5q14      | <i>MEF2C</i>     | rs1366594  | 88411817        | A/C                 | 0.375     | 0.383        | 0.795   | 1.04 (0.79-1.35) |         |                  |
| 6p21      | <i>MHC</i>       | rs3130340  | 32352605        | C/T                 | 0.158     | 0.218        | 0.004   | 1.48 (1.13-1.95) |         |                  |
| 6q25      | <i>ESR1</i>      | rs9479055  | 151889660       | A/C                 | 0.236     | 0.220        | 0.482   | 0.91 (0.71-1.18) |         |                  |
|           |                  | rs9478223  | 151941931       | C/T                 | 0.050     | 0.051        | 0.885   | 1.04 (0.63-1.71) |         |                  |
|           |                  | rs4870044  | 151943102       | C/T                 | 0.195     | 0.184        | 0.625   | 0.93 (0.70-1.23) |         |                  |
|           |                  | rs1038304  | 151974868       | G/A                 | 0.467     | 0.506        | 0.149   | 0.86 (0.69-1.06) |         |                  |
|           |                  | rs6929137  | 151978370       | A/G                 | 0.307     | 0.343        | 0.173   | 1.18 (0.93-1.49) |         |                  |
|           |                  | rs7751941  | 151988351       | A/G                 | 0.022     | 0.029        | 0.409   | 1.32 (0.67-2.61) |         |                  |
|           |                  | rs6900157  | 151995820       | C/T                 | 0.343     | 0.378        | 0.170   | 1.17 (0.94-1.45) |         |                  |
|           |                  | rs2941740  | 152051331       | G/A                 | 0.178     | 0.148        | 0.152   | 1.23 (0.93-1.64) |         |                  |
|           |                  | rs1999805  | 152110057       | A/G                 | 0.306     | 0.310        | 0.898   | 1.02 (0.81-1.28) |         |                  |
|           |                  | rs2504063  | 152132400       | G/A                 | 0.226     | 0.204        | 0.388   | 1.13 (0.86-1.49) |         |                  |
|           |                  | 7p14       | <i>STARD3NL</i> | rs1524058           | 38102802  | T/C          | 0.468   | 0.439            | 0.284   | 1.12 (0.91-1.39) |
|           |                  | 7q21       | <i>FLJ42280</i> | rs4729260           | 95955854  | G/C          | 0.155   | 0.085            | 1.17E-4 | 1.98 (1.39-2.80) |
|           |                  |            |                 | rs7781370           | 95971467  | T/C          | 0.154   | 0.102            | 0.008   | 1.59 (1.13-2.24) |
| 8q24      | <i>TNFRSF11B</i> | rs4355801  | 119993054       | G/A                 | 0.278     | 0.295        | 0.483   | 0.92 (0.73-1.17) |         |                  |
|           |                  | rs2062377  | 120076601       | T/A                 | 0.273     | 0.295        | 0.348   | 0.89 (0.71-1.13) |         |                  |
|           |                  | rs6469792  | 120077552       | T/C                 | 0.411     | 0.430        | 0.470   | 0.92 (0.75-1.15) |         |                  |
|           |                  | rs6469804  | 120114010       | G/A                 | 0.206     | 0.231        | 0.243   | 0.86 (0.67-1.11) |         |                  |
|           |                  | rs6993813  | 120121419       | T/C                 | 0.346     | 0.369        | 0.367   | 0.91 (0.73-1.13) |         |                  |
| 11p15     | <i>SOX6</i>      | rs7117858  | 15651038        | G/A                 | 0.197     | 0.181        | 0.437   | 1.11 (0.89-1.39) |         |                  |
| 11p13     | <i>DCDC5</i>     | rs16921914 | 31167347        | A/G                 | 0.367     | 0.392        | 0.358   | 1.11 (0.89-1.40) |         |                  |
| 11p11     | <i>ARHGAP1</i>   | rs7932354  | 46678797        | C/T                 | 0.322     | 0.333        | 0.665   | 1.05 (0.84-1.32) |         |                  |
| 11q13     | <i>LRP5</i>      | rs599083   | 67948922        | G/T                 | 0.259     | 0.244        | 0.532   | 0.93 (0.72-1.19) |         |                  |
|           |                  | rs3736228  | 67957871        | T/C                 | 0.194     | 0.170        | 0.211   | 1.17 (0.89-1.55) |         |                  |
| 12q13     | <i>SP7</i>       | rs2016266  | 52014222        | G/A                 | 0.193     | 0.193        | 0.991   | 1.00 (0.76-1.33) |         |                  |
| 13q14     | <i>TNFRSF11</i>  | rs7992970  | 41843463        | G/A                 | 0.323     | 0.334        | 0.648   | 0.95 (0.76-1.19) |         |                  |
|           |                  | rs9533090  | 41849449        | T/C                 | 0.065     | 0.101        | 0.012   | 0.62 (0.42-0.91) |         |                  |
|           |                  | rs9594738  | 41850145        | T/C                 | 0.068     | 0.102        | 0.020   | 0.64 (0.44-0.94) |         |                  |
|           |                  | rs9533093  | 41859597        | T/C                 | 0.406     | 0.421        | 0.575   | 0.94 (0.76-1.17) |         |                  |
|           |                  | rs10507508 | 41867782        | G/A                 | 0.115     | 0.138        | 0.195   | 0.81 (0.59-1.12) |         |                  |
|           |                  | rs9594751  | 41895267        | T/C                 | 0.039     | 0.062        | 0.044   | 0.61 (0.37-1.00) |         |                  |
|           |                  | rs9594759  | 41930593        | T/C                 | 0.183     | 0.233        | 0.018   | 0.74 (0.57-0.96) |         |                  |
|           |                  | 14q32      | <i>MARK3</i>    | rs2010281           | 102932075 | A/G          | 0.140   | 0.137            | 0.877   | 0.98 (0.72-1.32) |
|           |                  | 16q24      | <i>FOXLI</i>    | rs10048146          | 85268161  | G/A          | 0.221   | 0.247            | 0.407   | 0.86 (0.61-1.22) |
|           |                  | 17q21      | <i>SOST</i>     | rs1107748           | 39129340  | C/T          | 0.321   | 0.304            | 0.515   | 0.92 (0.73-1.17) |
| rs7220711 | 39145491         |            |                 | G/A                 | 0.320     | 0.313        | 0.775   | 1.03 (0.82-1.29) |         |                  |
| rs1513670 | 39162857         |            |                 | C/T                 | 0.420     | 0.398        | 0.407   | 0.91 (0.74-1.13) |         |                  |
| 17q21     | <i>HDAC5</i>     | rs228769   | 39548711        | C/G                 | 0.398     | 0.391        | 0.829   | 0.97 (0.70-1.34) |         |                  |
| 18q21     | <i>TNFRSF11A</i> | rs884205   | 58205837        | A/C                 | 0.036     | 0.084        | 0.015   | 2.47 (1.16-5.25) |         |                  |
|           |                  | rs3018362  | 58233073        | G/A                 | 0.209     | 0.199        | 0.715   | 1.06 (0.77-1.47) |         |                  |

MAF = minor allele frequency; OR = odds ratio; CI = confidence interval. <sup>a</sup>The former allele represents the minor allele.
